# Supplementary material for: Biomimetic Catalysts Based on Au@TiO2-MoS2-CeO2 Composites for the Production of Hydrogen by Water Splitting
Source: MDPI journal article supplement (doi:10.3390/ijms24010363), 2022-12-26
Supplement: s1 [file s1]

## Supplementary Information

# Biomimetic Catalysts Based on Au@TiO<sub>2</sub>-MoS<sub>2</sub>-CeO<sub>2</sub> Composites for the Production of Hydrogen by Water Splitting

Kenneth Fontáñez <sup>1</sup>, Diego García <sup>2</sup>, Dayna Ortiz <sup>3</sup>, Paola Sampayo <sup>3</sup>, Luis Hernández <sup>3</sup>,  
María Cotto <sup>3</sup>, José Ducongé <sup>3</sup>, Francisco Díaz <sup>3</sup>, Carmen Morant <sup>4</sup>, Florian Petrescu <sup>3</sup>,  
Abniel Machín <sup>5,\*</sup>, and Francisco Márquez <sup>3,\*</sup>

<sup>1</sup> Department of Chemistry, University of Puerto Rico, Rio Piedras Campus, San Juan, 00925PR, United States

<sup>2</sup> Department of Biochemistry, School of Medicine, University of Puerto Rico, Medical Sciences Campus, San Juan, 00936PR, United States

<sup>3</sup> Nanomaterials Research Group, Department of Natural Sciences and Technology, Division of Natural Sciences, Technology and Environment, Universidad Ana G. Méndez-Gurabo Campus, 00778PR, United States

<sup>4</sup> Department of Applied Physics, Autonomous University of Madrid, and Instituto de Ciencia de Materiales Nicolás Cabrera, 28049, Madrid, Spain

<sup>5</sup> Department of Natural Sciences and Technology, Division of Natural Sciences, Technology and Environment, Universidad Ana G. Méndez-Cupey Campus, 00926PR, United States

\* Correspondence: fmarquez@uagm.edu (F.M.), machina1@uagm.edu (A.M.)

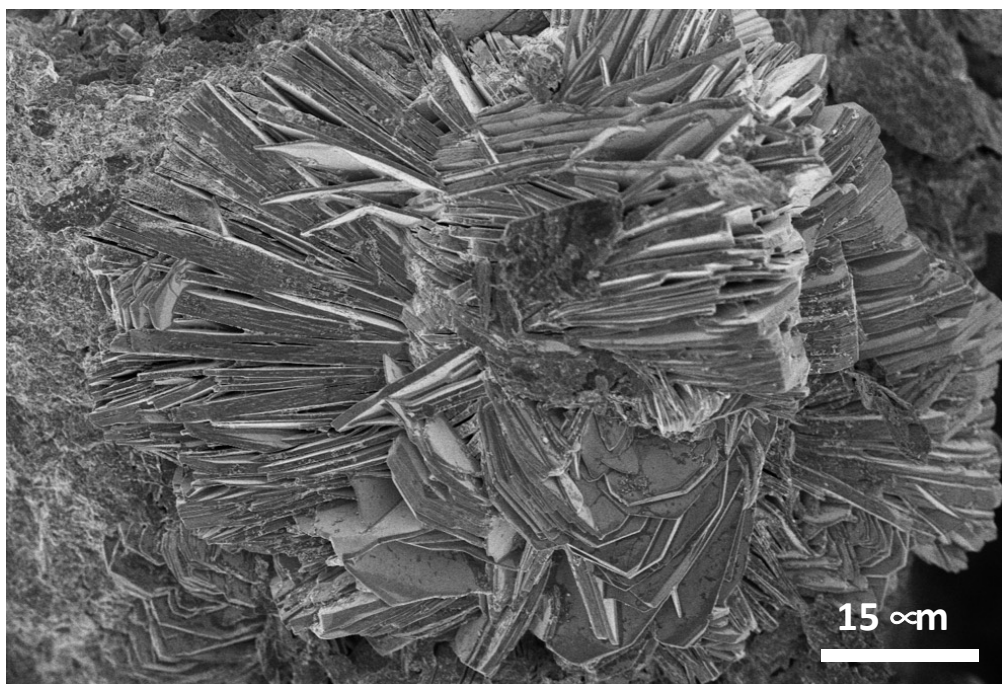

**Figure S1.** HR-SEM micrograph of a MoS<sub>2</sub> particle in an intermediate stage of exfoliation, and before being dispersed.

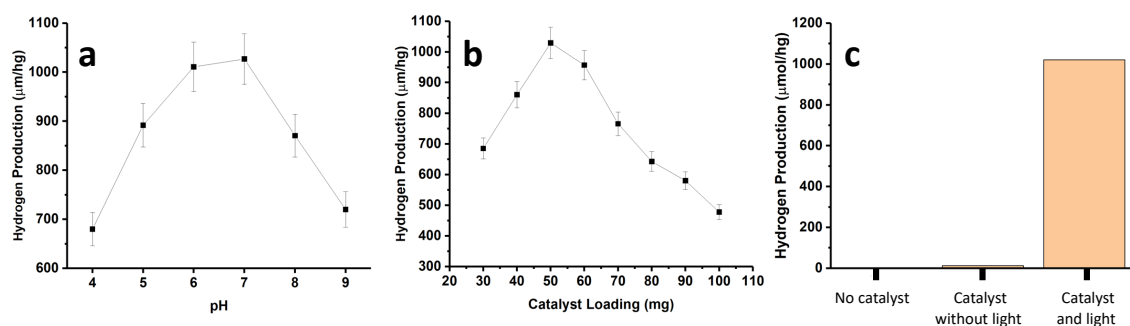

**Figure S2.** Evaluation of the initial concentration of the catalyst (5%Au@TiO<sub>2</sub>NWs-5%MoS<sub>2</sub>-5%CeO<sub>2</sub>NPs) (a) and of the pH (b) on the H<sub>2</sub> production; and control experiments for 3%Au@TiO<sub>2</sub>NWs-5%MoS<sub>2</sub>-5%CeO<sub>2</sub>NPs (c).

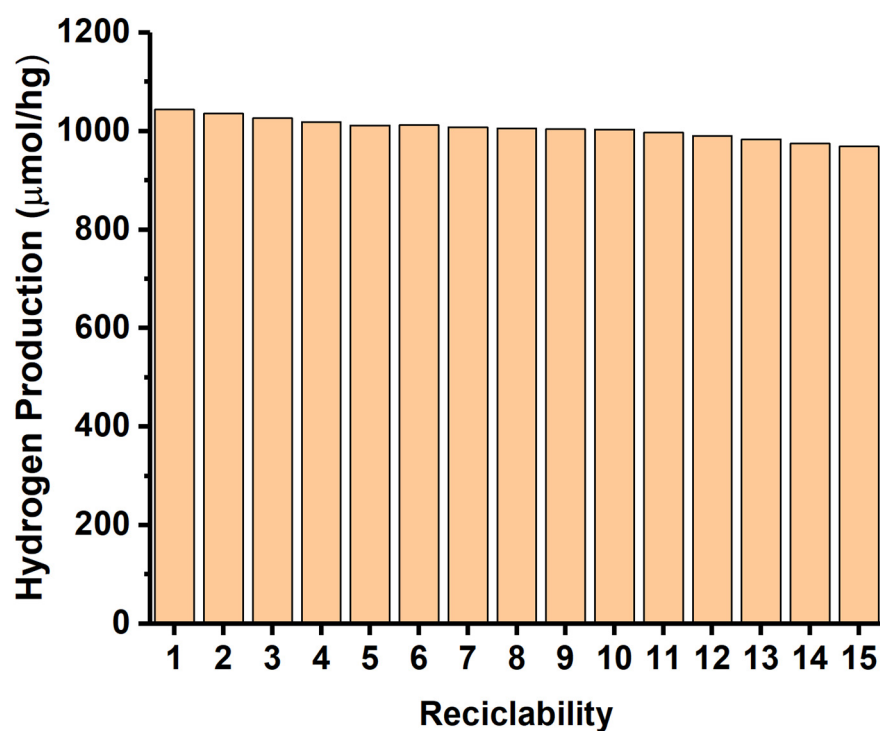

**Figure S3.** Recyclability of 5%Au@TiO<sub>2</sub>NWs-5%MoS<sub>2</sub>-5%CeO<sub>2</sub>NPs after 15 consecutive catalytic HER cycles under UV-visible radiation. The results obtained are affected by 5% error.

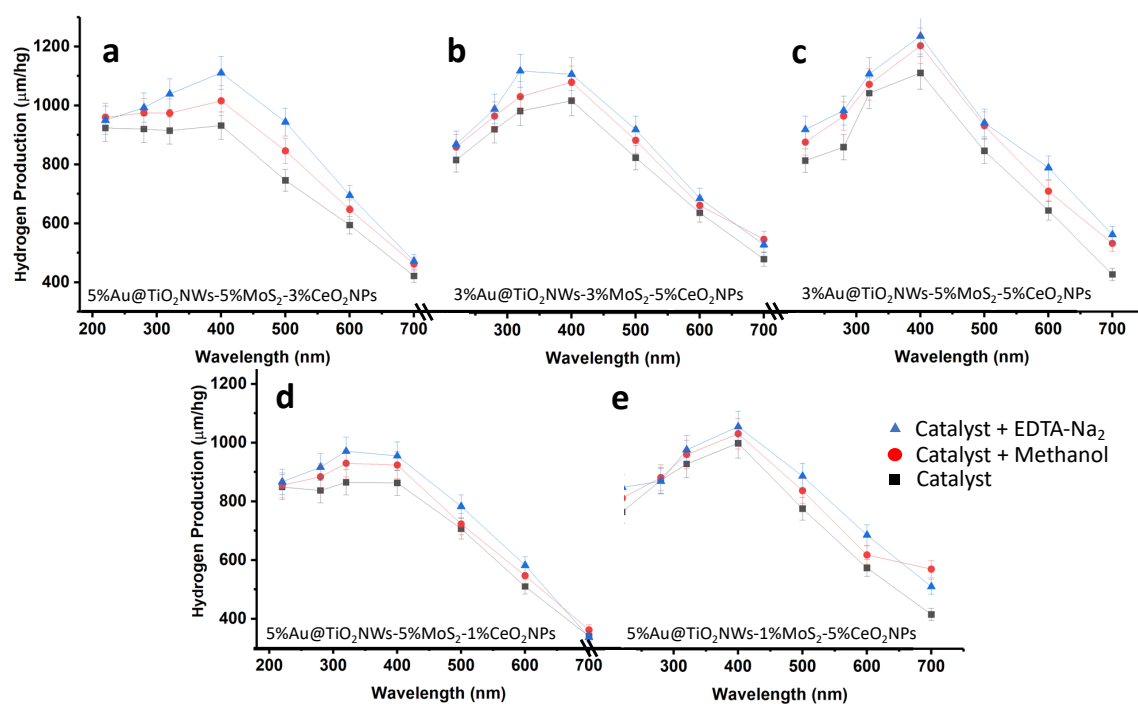

**Figure S4.** Photocatalytic activity of the most representative types of catalysts in the presence of hole scavengers (methanol and EDTA-Na<sub>2</sub>) under UV-vis radiation. Black symbols show the results obtained with the catalyst alone. The symbols in red and blue color show the results obtained with the catalyst in the presence of methanol and EDTA-NA<sub>2</sub> respectively.

**Table S1.** BET surface area of the as-synthesized materials.

| Material                                                             | BET area (m <sup>2</sup> /g) |
|----------------------------------------------------------------------|------------------------------|
| TiO <sub>2</sub> NWs                                                 | 236                          |
| 1%Au@TiO <sub>2</sub> NWs                                            | 242                          |
| 3%Au@TiO <sub>2</sub> NWs                                            | 263                          |
| 5%Au@TiO <sub>2</sub> NWs                                            | 275                          |
| MoS <sub>2</sub>                                                     | 183                          |
| CeO <sub>2</sub> NPs                                                 | 241                          |
| 1%Au@TiO <sub>2</sub> NWs-1%MoS <sub>2</sub> -5%CeO <sub>2</sub> NPs | 311                          |
| 3%Au@TiO <sub>2</sub> NWs-1%MoS <sub>2</sub> -5%CeO <sub>2</sub> NPs | 327                          |
| 5%Au@TiO <sub>2</sub> NWs-1%MoS <sub>2</sub> -5%CeO <sub>2</sub> NPs | 252                          |
| 1%Au@TiO <sub>2</sub> NWs-3%MoS <sub>2</sub> -5%CeO <sub>2</sub> NPs | 301                          |
| 3%Au@TiO <sub>2</sub> NWs-3%MoS <sub>2</sub> -5%CeO <sub>2</sub> NPs | 322                          |
| 5%Au@TiO <sub>2</sub> NWs-3%MoS <sub>2</sub> -5%CeO <sub>2</sub> NPs | 329                          |
| 1%Au@TiO <sub>2</sub> NWs-5%MoS <sub>2</sub> -1%CeO <sub>2</sub> NPs | 289                          |
| 3%Au@TiO <sub>2</sub> NWs-5%MoS <sub>2</sub> -1%CeO <sub>2</sub> NPs | 295                          |
| 5%Au@TiO <sub>2</sub> NWs-5%MoS <sub>2</sub> -1%CeO <sub>2</sub> NPs | 307                          |
| 1%Au@TiO <sub>2</sub> NWs-5%MoS <sub>2</sub> -3%CeO <sub>2</sub> NPs | 248                          |
| 3%Au@TiO <sub>2</sub> NWs-5%MoS <sub>2</sub> -3%CeO <sub>2</sub> NPs | 261                          |
| 5%Au@TiO <sub>2</sub> NWs-5%MoS <sub>2</sub> -3%CeO <sub>2</sub> NPs | 272                          |
| 1%Au@TiO <sub>2</sub> NWs-5%MoS <sub>2</sub> -5%CeO <sub>2</sub> NPs | 332                          |
| 3%Au@TiO <sub>2</sub> NWs-5%MoS <sub>2</sub> -5%CeO <sub>2</sub> NPs | 347                          |
| 5%Au@TiO <sub>2</sub> NWs-5%MoS <sub>2</sub> -5%CeO <sub>2</sub> NPs | 396                          |

**Table S2.** Maximum H<sub>2</sub> production (μmol/hg) by the synthesized catalysts under irradiation at different wavelengths. All values obtained are affected by 5% error.

| Catalyst                                                             | Irradiation Wavelength (nm) |     |      |      |     |     |     |
|----------------------------------------------------------------------|-----------------------------|-----|------|------|-----|-----|-----|
|                                                                      | 220                         | 280 | 320  | 400  | 500 | 600 | 700 |
| 1%Au@TiO <sub>2</sub> NWs-1%MoS <sub>2</sub> -5%CeO <sub>2</sub> NPs | 577                         | 618 | 675  | 684  | 603 | 463 | 342 |
| 3%Au@TiO <sub>2</sub> NWs-1%MoS <sub>2</sub> -5%CeO <sub>2</sub> NPs | 669                         | 788 | 876  | 980  | 708 | 565 | 397 |
| 5%Au@TiO <sub>2</sub> NWs-1%MoS <sub>2</sub> -5%CeO <sub>2</sub> NPs | 762                         | 869 | 924  | 993  | 773 | 571 | 416 |
| 1%Au@TiO <sub>2</sub> NWs-3%MoS <sub>2</sub> -5%CeO <sub>2</sub> NPs | 637                         | 678 | 741  | 744  | 661 | 493 | 398 |
| 3%Au@TiO <sub>2</sub> NWs-3%MoS <sub>2</sub> -5%CeO <sub>2</sub> NPs | 818                         | 922 | 984  | 1019 | 826 | 639 | 480 |
| 5%Au@TiO <sub>2</sub> NWs-3%MoS <sub>2</sub> -5%CeO <sub>2</sub> NPs | 814                         | 907 | 949  | 971  | 803 | 661 | 521 |
| 1%Au@TiO <sub>2</sub> NWs-5%MoS <sub>2</sub> -1%CeO <sub>2</sub> NPs | 537                         | 556 | 573  | 606  | 555 | 380 | 298 |
| 3%Au@TiO <sub>2</sub> NWs-5%MoS <sub>2</sub> -1%CeO <sub>2</sub> NPs | 845                         | 811 | 821  | 819  | 668 | 462 | 323 |
| 5%Au@TiO <sub>2</sub> NWs-5%MoS <sub>2</sub> -1%CeO <sub>2</sub> NPs | 849                         | 837 | 865  | 863  | 707 | 511 | 341 |
| 1%Au@TiO <sub>2</sub> NWs-5%MoS <sub>2</sub> -3%CeO <sub>2</sub> NPs | 625                         | 644 | 653  | 675  | 599 | 424 | 325 |
| 3%Au@TiO <sub>2</sub> NWs-5%MoS <sub>2</sub> -3%CeO <sub>2</sub> NPs | 897                         | 861 | 876  | 905  | 733 | 583 | 381 |
| 5%Au@TiO <sub>2</sub> NWs-5%MoS <sub>2</sub> -3%CeO <sub>2</sub> NPs | 924                         | 920 | 915  | 932  | 741 | 594 | 420 |
| 1%Au@TiO <sub>2</sub> NWs-5%MoS <sub>2</sub> -5%CeO <sub>2</sub> NPs | 726                         | 708 | 854  | 889  | 749 | 536 | 402 |
| 3%Au@TiO <sub>2</sub> NWs-5%MoS <sub>2</sub> -5%CeO <sub>2</sub> NPs | 815                         | 861 | 1045 | 1114 | 848 | 645 | 427 |
| 5%Au@TiO <sub>2</sub> NWs-5%MoS <sub>2</sub> -5%CeO <sub>2</sub> NPs | 656                         | 803 | 934  | 1044 | 801 | 542 | 369 |

**Table S3:** Recent research on photocatalytic hydrogen production using heterostructured catalysts.

| Catalyst                                                             | H <sub>2</sub> Production   | Reference |
|----------------------------------------------------------------------|-----------------------------|-----------|
| 3%Au@ZnO-5%MoS <sub>2</sub> -5%CeO <sub>2</sub>                      | 1114 $\mu\text{mol/hg}$     | This work |
| ZnCdS@Co-MoS <sub>2</sub>                                            | 551.48 $\mu\text{mol/h}$    | [1]       |
| Au@CeO <sub>2</sub>                                                  | 1.6-8.6 $\mu\text{mol/hmg}$ | [2]       |
| Pd@TiO <sub>2</sub>                                                  | 979 $\mu\text{mol/hg}$      | [3]       |
| CeO <sub>2</sub> @MoS <sub>2</sub> /g-C <sub>3</sub> N <sub>4</sub>  | 65 $\mu\text{mol/h}$        | [4]       |
| B-doped CN <sub>4</sub> /ZnO                                         | 357 $\mu\text{mol/hg}$      | [5]       |
| SrTiO <sub>3</sub> @TiO <sub>2</sub> @Fe <sub>2</sub> O <sub>3</sub> | 716 $\mu\text{mol/cm}^3$    | [6]       |
| 3DOM SnS <sub>2</sub> -ZnS/ZrO <sub>2</sub>                          | 928.1 $\mu\text{mol}$       | [7]       |
| Au-CuO <sub>2</sub>                                                  | 153 $\mu\text{mol/h g}$     | [8]       |

## References

1. Yonggang, L.; Yingzhen, Z.; Zengxing, L.; Shen, X.; Jianying, H.; Kim, H.N.; Yuekun, L. Molybdenum Sulfide Cocatalyst Activation upon Photodeposition of Cobalt for Improved Photocatalytic Hydrogen Production Activity of ZnCdS. *Chem. Eng. J.* **2021**, 425, 131478. <https://doi.org/10.1016/j.cej.2021.131478>
2. Dung, V.D.; Thuy T.D. N.; Periyayya, U.; Yeong-Hoon, C.; Gyu-Cheol, K.; Jin-Kyu, Y.; Duy-Thanh T.; Thanh Duc, L.; Hyuk, C.; Hyun You, K.; Yeon-Tae Y.; In-Hwan, L. Insightful Understanding of Hot-carrier Generation and Transfer in Plasmonic Au@CeO<sub>2</sub> Core-Shell Photocatalysts for Light-Driven Hydrogen Evolution Improvement. *App. Catal. B. Environ.* **2021**, 286, 119947. <https://doi.org/10.1016/j.apcatb.2021.119947>
3. Rusinque, B.; Escobedo, S.; de Lasa, H. Hydrogen Production via Pd-TiO<sub>2</sub> Photocatalytic Water Splitting under Near-UV and Visible Light: Analysis of the Reaction Mechanism. *Catalysts* **2021**, 11, 405. <https://doi.org/10.3390/catal11030405>
4. Chengzhang, Z.; Yuting, W.; Zhifeng, J.; Fanchao, X.; Qiming, X.; Cheng, S.; Qing, T.; Weixin, Z.; Xiaoguang, D.; Shaobin, W. CeO<sub>2</sub> Nanocrystal-modified Layered MoS<sub>2</sub>/g-C<sub>3</sub>N<sub>4</sub> as 0D/2D Ternary Composite for Visible-Light Photocatalytic Hydrogen Evolution: Interfacial Consecutive Multi-Step Electron Transfer and Enhanced H<sub>2</sub>O Reactant Adsorption. *Appl. Catal. B. Environ.* **2019**, 259, 118072. <https://doi.org/10.1016/j.apcatb.2019.118072>
5. Donghyung, K.; Kijung, Y. Boron Doping Induced Charge Transfer Switching of a C<sub>3</sub>N<sub>4</sub>/ZnO Photocatalyst from Z-Scheme to Type II to Enhance Photocatalytic Hydrogen Production. *Appl. Catal. B. Environ.* **2021**, 282, 119538. <https://doi.org/10.1016/j.apcatb.2020.119538>
6. Bashiri, R.; Irfan, M.S.; Mohamed, N.M.; Sufian, S.; Ling, L.Y.; Suhaimi, N.A.; Samsudin, M.F.R. Hierarchically SrTiO<sub>3</sub>@TiO<sub>2</sub>@Fe<sub>2</sub>O<sub>3</sub> Nanorod Heterostructures for Enhanced

Photoelectrochemical Water Splitting. *Int. J Hydrogen Energy* **2021**, 46, 24607-24619.  
<https://doi.org/10.1016/j.ijhydene.2020.02.106>

7. Tian, Y.; Yang, X.; Li, L.; Zhu, Y.; Wu, Q.; Li, Y.; Ma, F.; Yu, Y. A Direct Dual Z-scheme 3DOM SnS<sub>2</sub>-ZnS/ZrO<sub>2</sub> Composite with Excellent Photocatalytic Degradation and Hydrogen Production Performance. *Chemosphere* **2021**, 279, 130882.
8. Ma, B.; Bi, J.; Lv, J.; Kong, C.; Yan, P.; Zhao, X.; Zhang, X.; Yang, T.; Yang, Z. Inter-Embedded Au-Cu<sub>2</sub>O Heterostructure for the Enhanced Hydrogen Production from Water Splitting under the Visible Light. *Chem. Eng. J.* **2021**, 41, 126709.  
<https://doi.org/10.1016/j.cej.2020.126709>
